# Supplementary material
Source: PubMed Central journal article supplement (PMC4103970)
Supplement: NIHMS601204-supplement-01.pdf [file NIHMS601204-supplement-01.pdf]

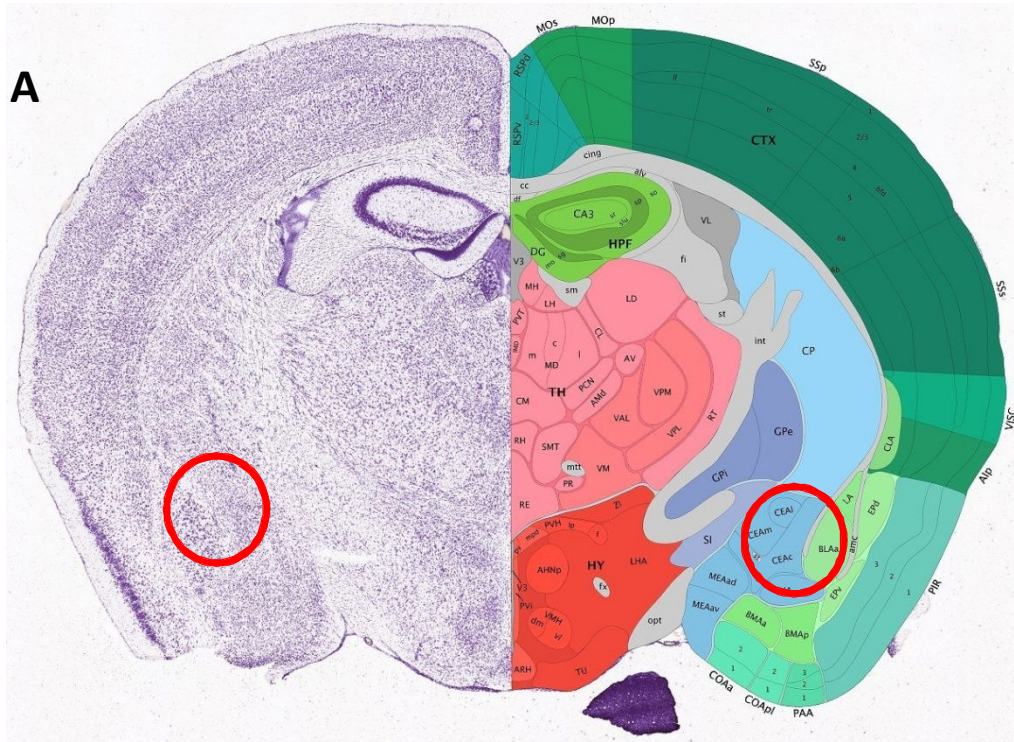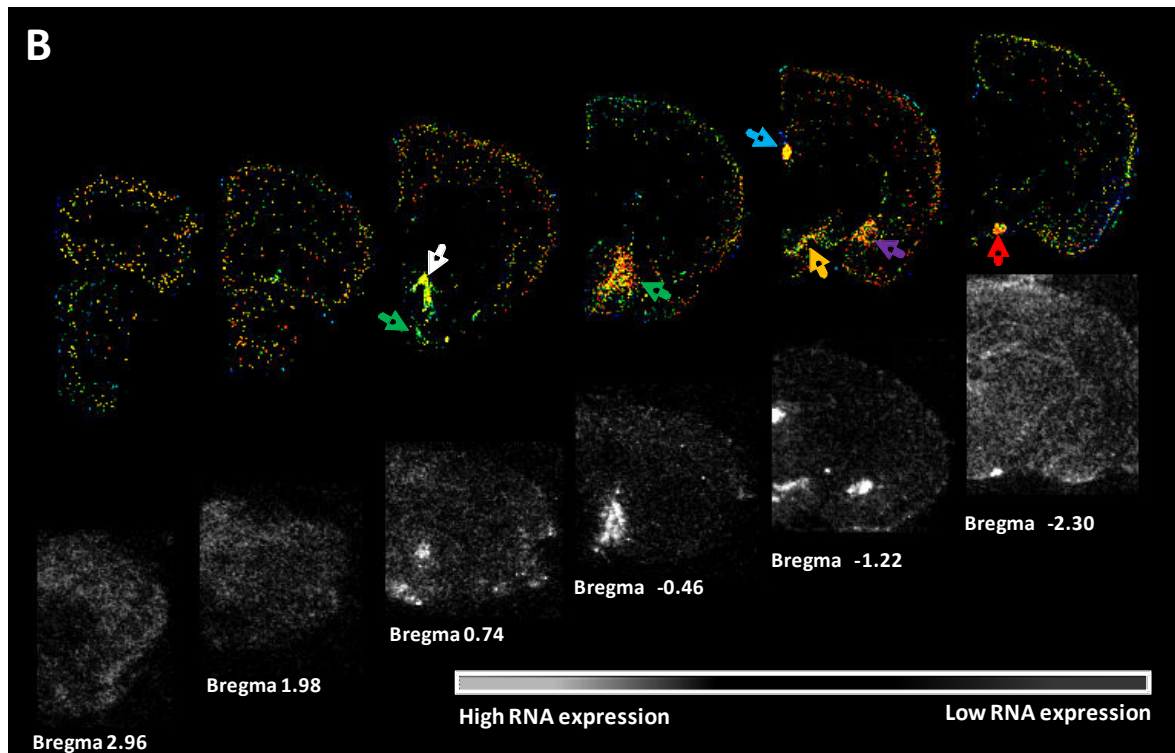

**Figure S1, related to Figure 1. Amygdala micropunches and *Tac2* in the adult male mouse brain. A)** Graphical representation of the 1mm amygdala punches. Image modified from Allen Brain Atlas. **B) Top,** Allen Brain Atlas *Tac2* mRNA levels expression by *in situ* hybridization (ISH), **Bottom,** ISH of *Tac2* mRNA levels performed in our lab. *Tac2* is expressed in: bed nucleus of the stria terminalis (white arrow), hypothalamus (green arrow), habenula (blue arrow), central amygdala (purple arrow), zona incerta (orange arrow) and medial mammillary nucleus (red arrow).

## Home Cage vs 30 min after Fear Conditioning

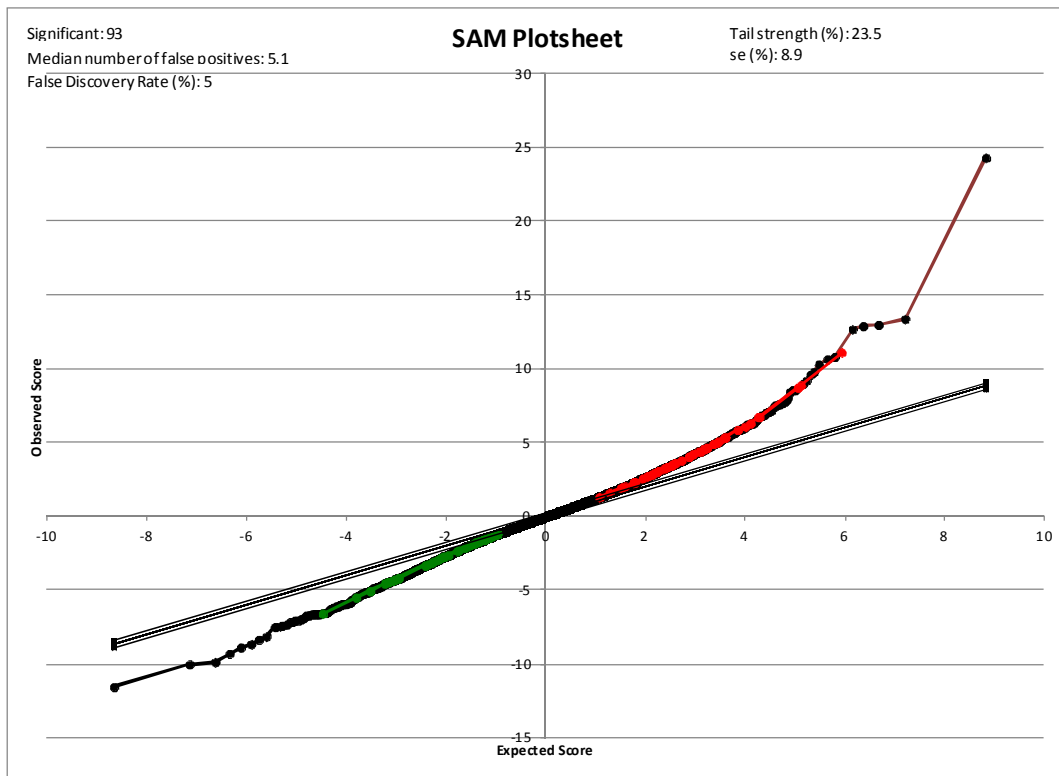

## Home Cage vs 2hrs after Fear Conditioning

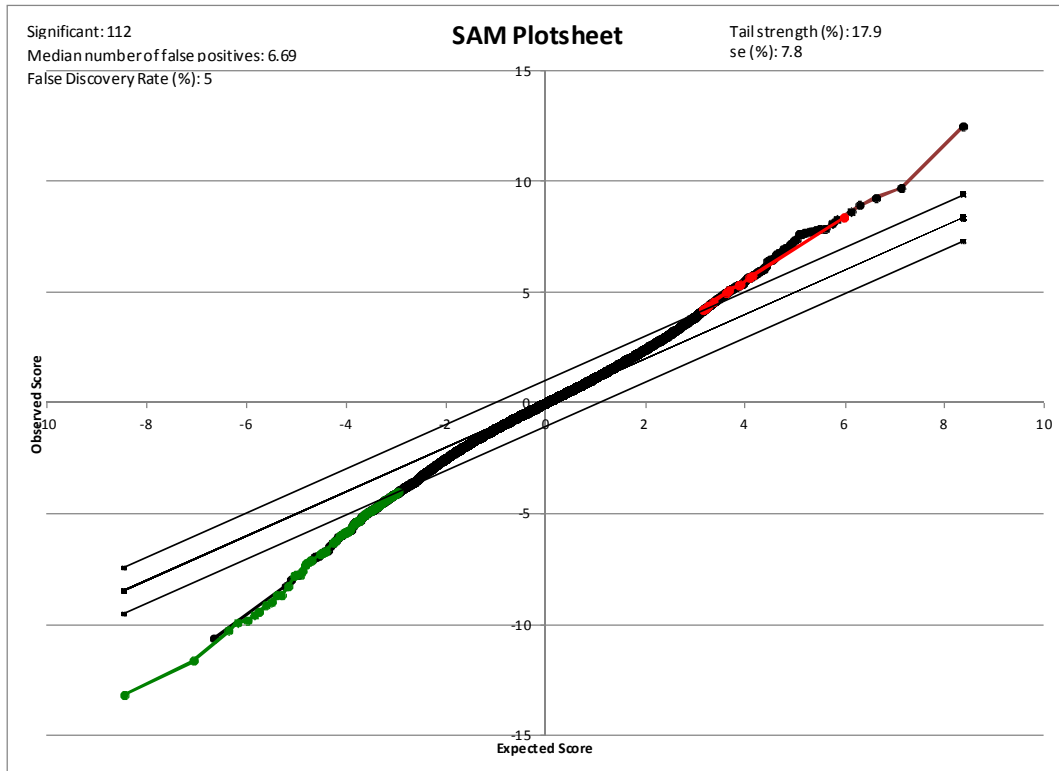

Figure S2, related to Figure 1. FDR analysis of the microarray.



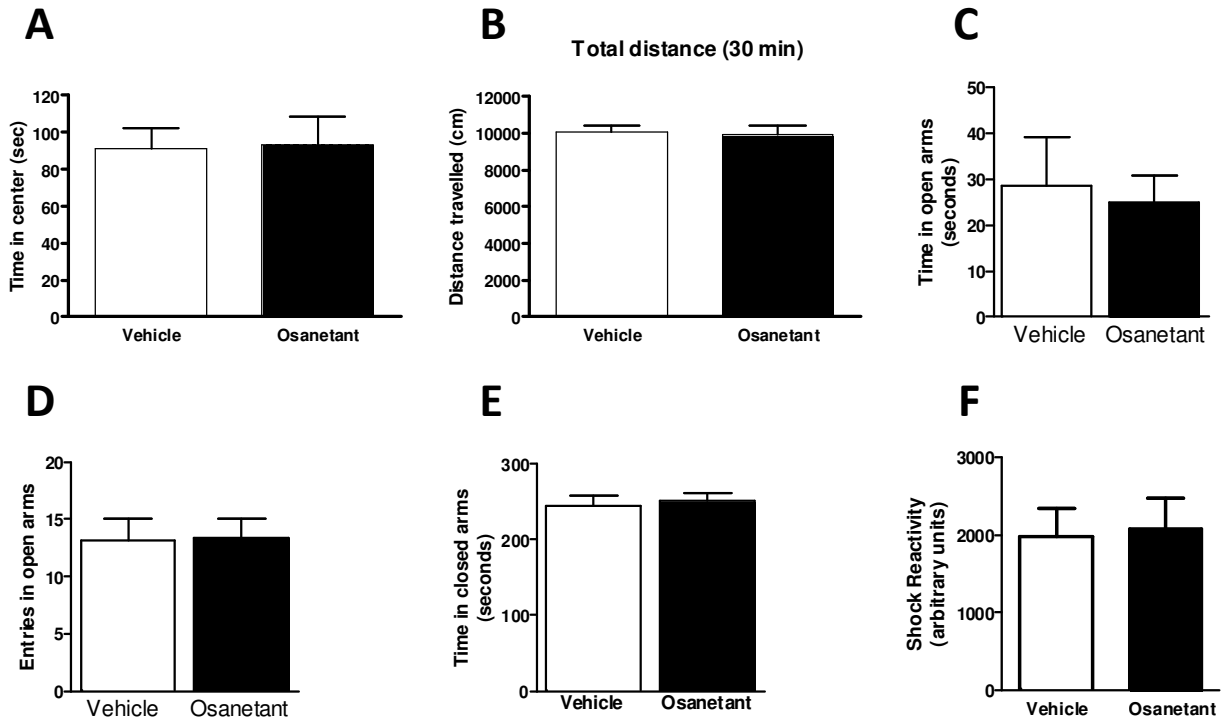

Osanetant or  
Vehicle (30 min before)

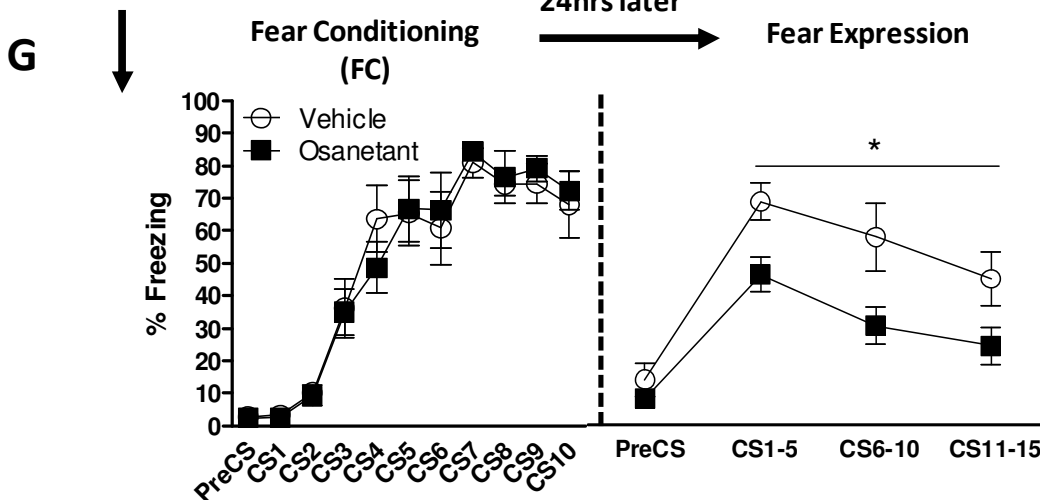

**Figure S4, related to Figure 4. Osanetant impairs fear learning with no effects on anxiety, locomotion nor shock reactivity.** Different cohorts of mice received systemic osanetant 30 minutes before open field, elevated plus maze or fear conditioning in the startle chamber. A) Osanetant did not modified anxiety-like behavior as shown by the time in the center of the open field. B) Animals receiving vehicle or osanetant showed equivalent distance travelled in the open field which indicates similar levels of locomotor activity. C, D and E) Osanetant did not modified anxiety-like behavior as shown by time in open arms, entries in open arms, and time in closed arms in the elevated plus maze. F) Equivalent shock reactivity shown when vehicle or osanetant was given 30 minutes before testing in the startle chamber. N=8 per group. G) Osanetant given systemically 30 minutes before FC impairs fear memory consolidation, without affecting fear expression, as shown by decreased freezing in the fear expression test. ANOVA repeated measures  $F_{1,11} = 6.298$ ,  $*P \leq 0.05$ , N=6-7 per group. Mean  $\pm$  SEM is shown.

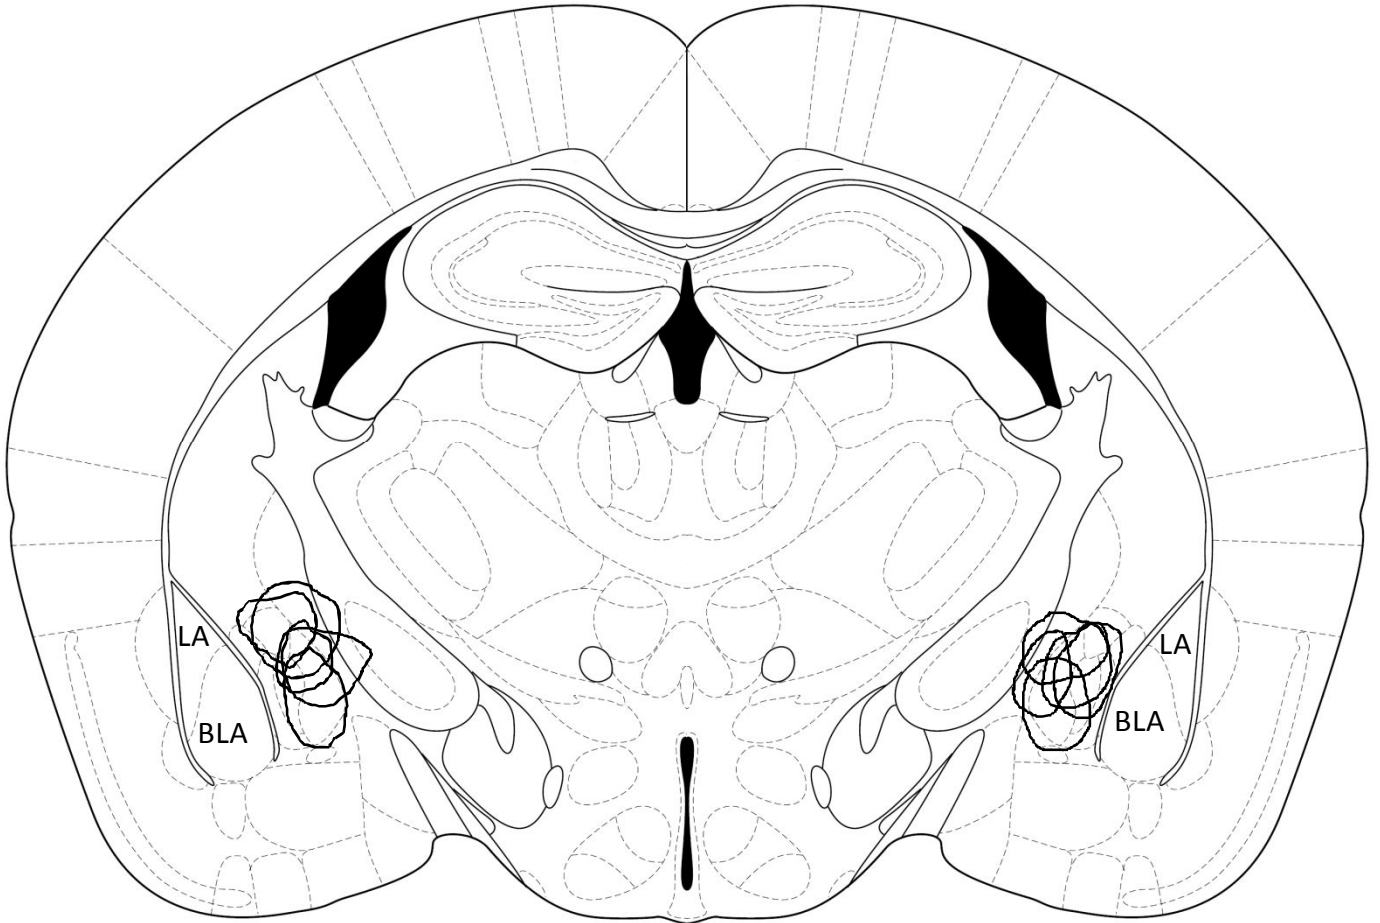

**Figure S5, related to Figure 5. Graphical representation of the LV-*Tac2* overexpression in the CeA.** Mice included in the analysis of the Lv-*Tac2* overexpression experiments had spread of infection in the CeA with no spread in BLA or LA.

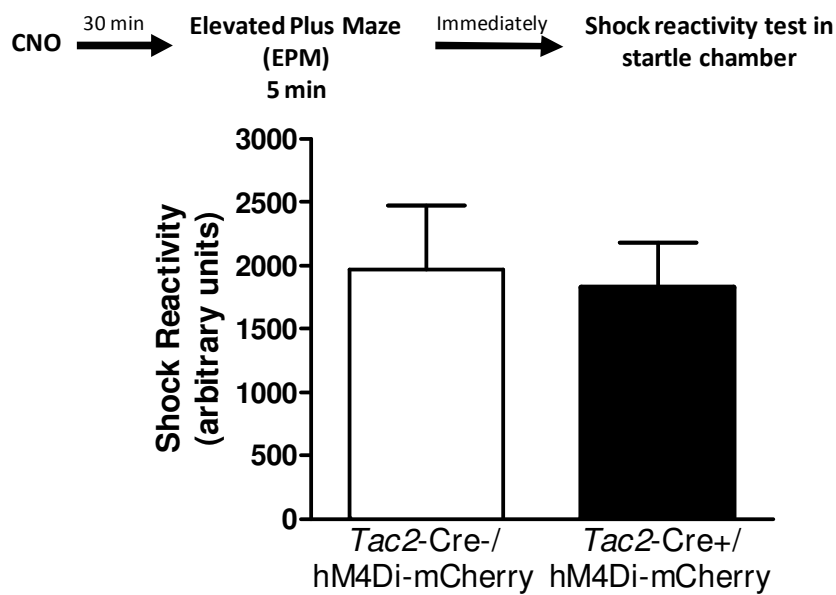

**Figure S6, related to Figure 6. No differences in pain sensitivity when silencing the *Tac2*-expressing cells in the CeA.** When CNO was given the two groups presented equivalent levels of shock reactivity suggesting no role in pain sensitivity of the *Tac2*-expressing cells in the CeA.



# Home Cage vs 30 min after Fear Conditioning

| Positive genes (47) |               |              |              |                   |             |            | Specifically highly expressed in Amygdala |
|---------------------|---------------|--------------|--------------|-------------------|-------------|------------|-------------------------------------------|
| Gene ID             | Gene Name     | Score(d)     | Numerator(r) | Denominator(s+s0) | Fold Change | q-value(%) |                                           |
| ILMN 1215713        | Egr4          | 11.09109     | 448.086375   | 40.40057155       | 2.020063897 | 0          | No                                        |
| ILMN 2623983        | Egr2          | 8.853620456  | 181.111425   | 20.45619935       | 2.620265596 | 0          | No                                        |
| ILMN 2597827        | Arc           | 8.685373586  | 227.156      | 26.15385484       | 2.062960434 | 0          | No                                        |
| ILMN 2993109        | Ddit4         | 6.742796897  | 122.68755    | 18.19535007       | 1.605673321 | 0          | Yes                                       |
| ILMN 1240323        | Dnajb1        | 6.740418626  | 667.968      | 99.0988894        | 1.514217387 | 0          | No                                        |
| ILMN 2621743        | Gad1          | 6.267292315  | 900.255      | 143.6433718       | 1.582504861 | 0          | No                                        |
| ILMN 2428798        | 5031439G07Rik | 6.067885974  | 193.230625   | 31.84480161       | 1.504898035 | 0          | No                                        |
| ILMN 2813484        | Per1          | 5.823966409  | 186.076375   | 31.9501113        | 1.563814839 | 0          | No                                        |
| ILMN 2529458        | LOC230253     | 5.345013621  | 368.137375   | 68.87491802       | 1.550070702 | 0          | Not found                                 |
| ILMN 2540574        | LOC100039751  | 5.344190279  | 215.00095    | 40.23078123       | 1.554178757 | 0          | Not found                                 |
| ILMN 1249586        | Hspa8         | 5.281728756  | 1035.7895    | 196.1080449       | 1.713159766 | 0          | No                                        |
| ILMN 2429164        | Gnal          | 5.049234589  | 147.52105    | 29.21651735       | 1.528365177 | 0          | No                                        |
| ILMN 1229990        | Axxt2l1       | 4.96592321   | 56.7663125   | 11.43117002       | 1.509492174 | 0          | No                                        |
| ILMN 2750515        | Fos           | 4.874668724  | 251.5296     | 51.59932176       | 2.226992961 | 0          | No                                        |
| ILMN 2547305        | Mobp          | 4.664755035  | 724.4794     | 155.3092059       | 1.763316284 | 0          | No                                        |
| ILMN 1213781        | LOC100045668  | 4.64413152   | 690.0135     | 148.5775106       | 1.520474741 | 0          | Not found                                 |
| ILMN 3001914        | Nfkbia        | 4.552292434  | 84.045925    | 18.46232996       | 1.584140663 | 0          | No                                        |
| ILMN 1214782        | Pdcd4         | 4.525457379  | 73.20375     | 16.17598927       | 1.519919275 | 0          | No                                        |
| ILMN 2512204        | mt-Nd4l       | 4.396633694  | 625.238475   | 142.2084528       | 1.564075602 | 0          | Not found                                 |
| ILMN 2666279        | Artdc3        | 4.343900064  | 136.096925   | 31.33058381       | 1.675007697 | 0          | No                                        |
| ILMN 1213954        | Spk1          | 4.189644324  | 2425.5965    | 578.9504579       | 2.153287601 | 0          | Not found                                 |
| ILMN 2778279        | Fosb          | 4.031953893  | 109.036625   | 27.04313229       | 2.001993665 | 0          | No                                        |
| ILMN 2589039        | Cox6c         | 4.023569824  | 1099.80625   | 273.3409132       | 1.545000572 | 0          | No                                        |
| ILMN 2771036        | Tac2          | 3.756458109  | 72.265125    | 19.23756978       | 1.530910817 | 0          | Yes                                       |
| ILMN 3150811        | Tsc2d3        | 3.57891997   | 392.643425   | 109.7100322       | 1.704397662 | 0          | No                                        |
| ILMN 2629112        | Asah3l        | 3.535665195  | 77.6940275   | 21.97437348       | 1.811136174 | 0          | No                                        |
| ILMN 2993334        | Plekhf1       | 3.496372748  | 46.2280125   | 13.22170599       | 1.654636919 | 0          | No                                        |
| ILMN 2661820        | Axxt2l1       | 3.431502545  | 57.9223425   | 16.87958605       | 1.648623678 | 0          | No                                        |
| ILMN 1259747        | Ij33          | 3.326436569  | 122.701225   | 36.88668713       | 1.620747847 | 0          | No                                        |
| ILMN 2690603        | Spp1          | 3.297199418  | 113.0287725  | 34.28023549       | 1.825019843 | 0          | No                                        |
| ILMN 1236666        | Acsf6         | 3.201617174  | 297.1804     | 92.82196586       | 1.549881389 | 0          | No                                        |
| ILMN 1248368        | Mat2a         | 3.043517283  | 60.58362     | 19.90579135       | 1.541339255 | 0          | No                                        |
| ILMN 3097381        | Mobp          | 2.98530051   | 254.12185    | 85.12437832       | 1.513612907 | 0          | No                                        |
| ILMN 1231336        | Ith3          | 2.870127576  | 259.4255     | 90.38814239       | 1.549312667 | 0          | No                                        |
| ILMN 1243212        | Sparc         | 2.806368689  | 105.97115    | 37.76095081       | 1.712435998 | 0          | No                                        |
| ILMN 2522571        | Setd7         | 2.713503356  | 183.06635    | 67.46494327       | 1.529557587 | 0          | No                                        |
| ILMN 1251845        | Slc10a4       | 2.680718709  | 91.694025    | 34.2050155        | 1.561757275 | 0          | No                                        |
| ILMN 3024681        | Mobp          | 2.536998361  | 126.469225   | 49.84994352       | 1.644011426 | 1.44049643 | No                                        |
| ILMN 2829594        | Hspa1a        | 2.306631118  | 44.44474     | 19.26824782       | 1.583647084 | 2.46345766 | No                                        |
| ILMN 2419660        | mtDNA ND4l    | 2.282619001  | 975.59975    | 427.4036751       | 1.687998977 | 2.46345766 | Not found                                 |
| ILMN 1221160        | Unc13c        | 2.274301059  | 524.917      | 230.8036564       | 1.598185616 | 2.46345766 | No                                        |
| ILMN 1248947        | Mal           | 2.244160184  | 412.900525   | 183.9888827       | 1.686683276 | 2.46345766 | No                                        |
| ILMN 2608073        | Nap1l5        | 2.000841183  | 617.368925   | 308.554687        | 1.592422133 | 2.46345766 | No                                        |
| ILMN 2955509        | Klf6          | 1.929954333  | 43.51373     | 22.54650758       | 1.564227411 | 2.46345766 | No                                        |
| ILMN 2851288        | Ngr1          | 1.922101228  | 67.611325    | 35.17527666       | 1.520851164 | 2.46345766 | No                                        |
| ILMN 2971816        | Gltp          | 1.908407039  | 212.9313     | 111.5754111       | 1.638608177 | 3.311271   | No                                        |
| ILMN 2776034        | Gal           | 1.569722534  | 105.71999    | 67.34947591       | 1.918109421 | 4.66974116 | Not found                                 |
| Negative genes (46) |               |              |              |                   |             |            | Specifically highly expressed in Amygdala |
| Gene ID             | Gene Name     | Score(d)     | Numerator(r) | Denominator(s+s0) | Fold Change | q-value(%) |                                           |
| ILMN 2445848        | Zfp238        | -6.604688573 | -541.292825  | 81.95584379       | 0.633207945 | 0          | No                                        |
| ILMN 1231710        | Crbp          | -5.507519811 | -352.8114    | 64.05994207       | 0.617678069 | 0          | No                                        |
| ILMN 1237518        | Dakp          | -5.076108892 | -386.055525  | 76.05343644       | 0.647158987 | 0          | No                                        |
| ILMN 2512430        | Zfp312        | -4.568837049 | -359.568     | 78.70011474       | 0.592832409 | 0          | Not found                                 |
| ILMN 2765047        | Chrd          | -4.477980048 | -139.352375  | 31.11947206       | 0.611599623 | 0          | No                                        |
| ILMN 1225037        | Grit          | -4.429721111 | -301.595725  | 68.08458534       | 0.651824595 | 0          | No                                        |
| ILMN 1233537        | Gucy1a3       | -4.343009636 | -177.507325  | 40.87196204       | 0.60642504  | 0          | No                                        |
| ILMN 2631143        | Sox5          | -4.327509869 | -224.538875  | 51.88639236       | 0.622381127 | 0          | No                                        |
| ILMN 2754435        | Ldb2          | -4.206027498 | -299.18965   | 71.13354588       | 0.657705278 | 0          | No                                        |
| ILMN 1237666        | Hgf           | -4.193621664 | -51.934115   | 12.38407257       | 0.663565557 | 0          | No                                        |
| ILMN 1239134        | Lynd1         | -3.349608084 | -1916.94025  | 572.287922        | 0.613051267 | 0          | No                                        |
| ILMN 2699052        | Nrn1          | -3.31875933  | -744.9555    | 224.4680695       | 0.641760953 | 0          | No                                        |
| ILMN 2658266        | Gpr22         | -3.214432735 | -128.865375  | 40.08961631       | 0.638597412 | 0          | No                                        |
| ILMN 1218051        | Jagap2        | -3.111689509 | -69.876375   | 22.4560885        | 0.649643389 | 0          | No                                        |
| ILMN 2610744        | Myl4          | -2.943877654 | -276.3328    | 93.86694436       | 0.654627582 | 0          | No                                        |
| ILMN 1221503        | Ccnd1         | -2.837528141 | -229.524675  | 80.88895109       | 0.658258852 | 0          | No                                        |
| ILMN 2521965        | Slc30a3       | -2.761973893 | -558.334725  | 202.1506164       | 0.60354295  | 0          | No                                        |
| ILMN 2708203        | Cdkn1c        | -2.746141043 | -266.22635   | 96.94562146       | 0.584778394 | 0          | No                                        |
| ILMN 1253365        | Lynd1         | -2.626335409 | -54.6324925  | 20.80179565       | 0.638234585 | 0          | No                                        |
| ILMN 2441534        | Rsp1          | -2.358040688 | -175.1799    | 74.29044839       | 0.614479793 | 1.44049643 | No                                        |
| ILMN 1235124        | Thsd4         | -2.310002725 | -82.00105    | 35.49824817       | 0.616168822 | 1.44049643 | No                                        |
| ILMN 2965903        | Hdc           | -2.126254237 | -82.24245    | 38.67949965       | 0.641656418 | 2.61505505 | No                                        |
| ILMN 2462222        | Trpm3         | -2.001557192 | -93.0324     | 46.48001084       | 0.480451755 | 2.61505505 | No                                        |
| ILMN 3098069        | Trpm3         | -1.859884751 | -79.73005    | 42.86827449       | 0.538840229 | 2.61505505 | No                                        |
| ILMN 1239718        | Tekt1         | -1.811694221 | -56.7152425  | 31.3050855        | 0.63055611  | 2.61505505 | No                                        |
| ILMN 2425028        | LOC675572     | -1.801794131 | -68.9699775  | 38.27850048       | 0.586268448 | 2.61505505 | Not found                                 |
| ILMN 1223317        | Lgals3        | -1.740191903 | -58.15569    | 33.41912458       | 0.659788291 | 2.61505505 | No                                        |
| ILMN 1236788        | Jgfbp2        | -1.73087102  | -75.2429525  | 43.47114929       | 0.589684943 | 3.311271   | No                                        |
| ILMN 1231588        | 1110059M19Rik | -1.722270889 | -41.34386    | 24.00543391       | 0.652319573 | 3.311271   | Not found                                 |
| ILMN 2599861        | Defb11        | -1.614213477 | -95.2135875  | 58.98450785       | 0.562523485 | 3.311271   | No                                        |
| ILMN 1231445        | Inmt          | -1.614170179 | -69.865225   | 43.28244068       | 0.659273264 | 3.311271   | No                                        |
| ILMN 3000679        | Folr1         | -1.594562306 | -103.1028275 | 64.65901463       | 0.565961557 | 3.311271   | No                                        |
| ILMN 2625855        | Gpx8          | -1.583467848 | -125.847775  | 79.47605323       | 0.638051159 | 3.311271   | No                                        |
| ILMN 2827072        | Slc13a4       | -1.539087861 | -224.576725  | 145.9154676       | 0.534402508 | 3.311271   | No                                        |
| ILMN 2980323        | Cldn2         | -1.535196244 | -89.83698    | 58.51823853       | 0.624617041 | 3.311271   | No                                        |
| ILMN 1236758        | Wfdc2         | -1.531491326 | -160.099015  | 104.5379835       | 0.532467445 | 3.311271   | No                                        |
| ILMN 1246173        | Mx1           | -1.474867165 | -117.485325  | 79.65824162       | 0.592201378 | 3.311271   | No                                        |
| ILMN 1255479        | Cldn2         | -1.469922793 | -84.461285   | 57.45967435       | 0.597583436 | 3.311271   | No                                        |
| ILMN 2667635        | Clic6         | -1.435307199 | -459.048725  | 319.8261149       | 0.639071004 | 3.311271   | No                                        |
| ILMN 2756486        | Aqp1          | -1.431527143 | -143.53467   | 100.2668169       | 0.597075016 | 3.311271   | No                                        |
| ILMN 1215019        | Dynlrb2       | -1.387852728 | -99.935385   | 72.00719715       | 0.624702255 | 4.66974116 | No                                        |
| ILMN 1221292        | Rdh5          | -1.384413084 | -135.0119    | 97.52284311       | 0.62760043  | 4.66974116 | No                                        |
| ILMN 1249135        | D230046H12Rik | -1.35015035  | -170.0683    | 125.9624901       | 0.631374711 | 4.66974116 | Not found                                 |
| ILMN 2617005        | Pfrr          | -1.311424762 | -249.72025   | 190.4190445       | 0.584598746 | 4.66974116 | No                                        |
| ILMN 2714278        | Z810046M22Rik | -1.281005496 | -58.9134125  | 45.98997636       | 0.653221478 | 4.66974116 | Not found                                 |
| ILMN 1253148        | Kl            | -1.267334037 | -154.62475   | 122.0078886       | 0.649612582 | 4.66974116 | No                                        |

Table S1, related to Figure 1. Genes regulated 30 minutes after auditory fear conditioning in the amygdala.

# Home Cage vs 2hrs after Fear Conditioning

| Positive genes (12)  |                |              |              |                   |             |            | Specifically highly expressed in Amygdala |
|----------------------|----------------|--------------|--------------|-------------------|-------------|------------|-------------------------------------------|
| Gene ID              | Gene Name      | Score(d)     | Numerator(f) | Denominator(s+s0) | Fold Change | q-value(%) |                                           |
| ILMN_1231471         | Zfp94          | 8.386723674  | 66.2835      | 7.903384275       | 1.301567758 | 0          | No                                        |
| ILMN_1237651         | Jpg            | 5.746539969  | 56.152       | 9.77144513        | 1.37053424  | 2.02653732 | No                                        |
| ILMN_1254047         | Slc26a9        | 5.668839016  | 17.0027025   | 2.999327102       | 1.34624468  | 2.02653732 | No                                        |
| ILMN_1243082         | G33050004Rik   | 5.354314626  | 90.828175    | 16.96354834       | 1.411632418 | 2.70204976 | No                                        |
| ILMN_3082287         | 4933421E11Rik  | 5.324176547  | 93.616375    | 17.58325896       | 1.328562119 | 2.70204976 | No                                        |
| ILMN_2778438         | A83000F12Rik   | 5.097568509  | 69.35875     | 13.60624185       | 1.350980686 | 2.70204976 | No                                        |
| ILMN_2635348         | Iqcb1          | 4.985462711  | 128.6372     | 25.80245956       | 1.313235676 | 3.61490441 | No                                        |
| ILMN_1235689         | Wdr37          | 4.575952594  | 79.6495      | 17.40610253       | 1.38320816  | 4.36146075 | No                                        |
| ILMN_1228782         | Iqhm1          | 4.407098228  | 179.181      | 40.65736472       | 1.385368852 | 4.50341627 | No                                        |
| ILMN_1223818         | Ttal1          | 4.355954051  | 62.014975    | 14.23682947       | 1.383169487 | 4.90831057 | No                                        |
| ILMN_2602140         | Eif2b5         | 4.298254351  | 144.87875    | 33.70643618       | 1.307688957 | 4.90831057 | No                                        |
| ILMN_3150996         | Bim            | 4.288698809  | 35.1514275   | 8.196295767       | 1.347426464 | 4.90831057 | No                                        |
| Negative genes (100) |                |              |              |                   |             |            | Specifically highly expressed in Amygdala |
| Gene ID              | Gene Name      | Score(d)     | Numerator(f) | Denominator(s+s0) | Fold Change | q-value(%) |                                           |
| ILMN_2742647         | EG665609       | -13.18903005 | -360.23875   | 27.31351347       | 0.765483534 | 0          | Not found                                 |
| ILMN_2534572         | LOC272681      | -11.63439244 | -1281.894    | 110.1814304       | 0.710609467 | 0          | Not found                                 |
| ILMN_1233890         | Rpl32          | -10.26487319 | -759.56925   | 73.99694432       | 0.688632154 | 0          | No                                        |
| ILMN_2542885         | Wdr89          | -9.914390811 | -29.2099775  | 2.946220101       | 0.6924394   | 0          | No                                        |
| ILMN_1245034         | LOC382061      | -9.807881635 | -64.69765    | 6.596495799       | 0.747901604 | 0          | No                                        |
| ILMN_1242465         | LOC231368      | -9.562144643 | -332.1655    | 34.73755234       | 0.606910107 | 0          | No                                        |
| ILMN_1244853         | LOC10044948    | -9.422660492 | -228.61865   | 24.2574945        | 0.72541822  | 0          | No                                        |
| ILMN_1253958         | EG237361       | -9.116487212 | -68.27585    | 7.489271735       | 0.713652393 | 0          | No                                        |
| ILMN_1251729         | Nfe2l1         | -8.986447765 | -578.07125   | 64.10446539       | 0.721485962 | 0          | No                                        |
| ILMN_1227066         | Scnn1l         | -8.676776743 | -74.748825   | 8.134469715       | 0.714107678 | 0          | No                                        |
| ILMN_2467534         | Jde            | -8.664299555 | -33.1442475  | 3.82538107        | 0.68713343  | 0          | No                                        |
| ILMN_1249586         | Hspa8          | -8.261388059 | -647.059     | 78.32327877       | 0.691796487 | 0          | No                                        |
| ILMN_1242107         | Cox7a2l        | -7.820227063 | -363.47725   | 46.47911717       | 0.765777047 | 0          | No                                        |
| ILMN_1232274         | LOC100048508   | -7.762831146 | -172.258375  | 22.19014838       | 0.65375335  | 0          | No                                        |
| ILMN_1250136         | LOC433943      | -7.733649127 | -113.805875  | 14.71567602       | 0.686031214 | 0          | No                                        |
| ILMN_2801790         | Chmp2a         | -7.586073989 | -215.54315   | 28.41300392       | 0.713615993 | 0          | No                                        |
| ILMN_1239293         | Sulf2          | -7.31719927  | -101.3827    | 13.85539689       | 0.644239178 | 0          | No                                        |
| ILMN_2691261         | Ndufb10        | -7.231030885 | -199.951125  | 27.65181455       | 0.651046482 | 0          | No                                        |
| ILMN_2753649         | Arpc1a         | -7.206729408 | -470.38175   | 65.26979485       | 0.7327373   | 0          | No                                        |
| ILMN_1218976         | EG426881       | -7.104605265 | -1063.466    | 149.6886255       | 0.72935339  | 0          | Not found                                 |
| ILMN_1213781         | LOC10045668    | -7.098802987 | -906.92625   | 127.7576306       | 0.593790195 | 0          | Not found                                 |
| ILMN_2771991         | Nrnr2          | -6.815501166 | -343.0758    | 50.33757484       | 0.671707012 | 0          | No                                        |
| ILMN_1243433         | LOC10046837    | -6.787070045 | -327.85595   | 48.44442057       | 0.681415218 | 0          | Not found                                 |
| ILMN_1239211         | LOC10047935    | -6.781295386 | -1030.80025  | 152.4560207       | 0.585323928 | 0          | Not found                                 |
| ILMN_2998173         | EG625054       | -6.722215024 | -1568.40225  | 233.316287        | 0.715198481 | 0          | Not found                                 |
| ILMN_2482571         | Flnb           | -6.6674168   | -40.0092     | 6.0007048         | 0.763066856 | 0          | No                                        |
| ILMN_2527129         | LOC329750      | -6.298088057 | -107.111675  | 17.00701451       | 0.753203711 | 0          | Not found                                 |
| ILMN_2768972         | Fam107a        | -6.269969641 | -509.48225   | 81.25753061       | 0.704283425 | 0          | No                                        |
| ILMN_1229517         | Fhl1           | -6.209956846 | -203.890975  | 32.83291334       | 0.763164682 | 0          | Not found                                 |
| ILMN_2985282         | Peci           | -6.024585368 | -55.4373     | 9.201844877       | 0.752201725 | 0          | No                                        |
| ILMN_2716098         | Hsp105         | -5.953547861 | -486.331     | 81.68759391       | 0.700583081 | 0          | No                                        |
| ILMN_2522542         | Klhd5          | -5.892894671 | -24.86875    | 4.22012464        | 0.762565075 | 0          | No                                        |
| ILMN_1240350         | LOC380692      | -5.865046433 | -590.50225   | 100.6815985       | 0.711629081 | 0          | Not found                                 |
| ILMN_1243988         | LOC269251      | -5.837333461 | -45.769075   | 7.840750457       | 0.749725599 | 0          | Not found                                 |
| ILMN_1241383         | Scrn1          | -5.831562089 | -118.1703    | 20.26391869       | 0.765772611 | 0          | No                                        |
| ILMN_1227972         | Rex1b          | -5.825457519 | -677.93525   | 116.3749934       | 0.733440067 | 0          | No                                        |
| ILMN_1213364         | LOC388982      | -5.815671661 | -70.044275   | 12.04405597       | 0.727412108 | 0          | Not found                                 |
| ILMN_1230065         | LOC345892      | -5.785888806 | -56.3077     | 9.714638079       | 0.713394463 | 0          | Not found                                 |
| ILMN_1249235         | LOC668387      | -5.774767235 | -150.013975  | 25.97749293       | 0.672015451 | 0          | Not found                                 |
| ILMN_1225930         | LOC10039346    | -5.74024713  | -173.251625  | 30.18191048       | 0.711070973 | 0          | Not found                                 |
| ILMN_2932359         | Tpt1           | -5.561411051 | -497.852925  | 89.51917426       | 0.663470887 | 0          | No                                        |
| ILMN_1230620         | LOC10039786    | -5.422858106 | -294.462     | 54.30014842       | 0.684022796 | 0          | Not found                                 |
| ILMN_2723474         | Adcy9          | -5.353195399 | -37.860525   | 7.072509441       | 0.75213138  | 1.68240834 | No                                        |
| ILMN_2486012         | C33006P03Rik   | -5.352651074 | -297.18535   | 55.52115127       | 0.709438103 | 1.68240834 | No                                        |
| ILMN_1214918         | LOC546015      | -5.350362671 | -232.924125  | 43.53426848       | 0.73767308  | 1.68240834 | No                                        |
| ILMN_1260088         | LOC10043527    | -5.348052949 | -808.25525   | 151.1307494       | 0.627012194 | 1.68240834 | No                                        |
| ILMN_2482572         | Flnb           | -5.345779391 | -44.750325   | 8.37115072        | 0.728672075 | 1.68240834 | No                                        |
| ILMN_2499944         | Tomm7          | -5.343228766 | -278.244225  | 52.0741741        | 0.765538179 | 1.68240834 | No                                        |
| ILMN_2542529         | LOC333841      | -5.295236894 | -15.534225   | 2.94407761        | 0.759806413 | 1.68240834 | Not found                                 |
| ILMN_2946901         | Slc25a38       | -5.27123272  | -20.429775   | 3.874186981       | 0.78353139  | 1.68240834 | No                                        |
| ILMN_1246148         | Dnd1           | -5.251507215 | -182.550975  | 34.71613462       | 0.746338965 | 1.68240834 | No                                        |
| ILMN_2668083         | LOC668706      | -5.10763296  | -453.829     | 88.8532116        | 0.71566404  | 0.07474628 | Not found                                 |
| ILMN_1222723         | LOC668239      | -5.094324315 | -567.32775   | 111.3646707       | 0.734652623 | 0.07474628 | Not found                                 |
| ILMN_1243991         | LOC433476      | -5.065888025 | -45.5451     | 8.990546135       | 0.768794452 | 0.07474628 | Not found                                 |
| ILMN_1233252         | Rnu65          | -5.059200088 | -49.329975   | 9.749757697       | 0.73718023  | 0.07474628 | Not found                                 |
| ILMN_3129825         | Prosc          | -4.998414849 | -54.278275   | 10.85909766       | 0.739032075 | 0.07474628 | No                                        |
| ILMN_2871262         | Bcap31         | -4.991386447 | -105.9871    | 21.23400004       | 0.743182016 | 0.07474628 | No                                        |
| ILMN_1258613         | N4bwp5.pending | -4.975576415 | -427.217     | 85.86281555       | 0.72439551  | 0.07474628 | Not found                                 |
| ILMN_1220739         | Nsg2           | -4.975203983 | -636.5485    | 127.9442013       | 0.668959094 | 0.07474628 | No                                        |
| ILMN_2987984         | S100a13        | -4.970119796 | -43.36135    | 8.724407414       | 0.738764859 | 0.07474628 | No                                        |
| ILMN_1216674         | LOC234882      | -4.891947016 | -163.12305   | 33.3452201        | 0.737577821 | 0.07474628 | Not found                                 |
| ILMN_2752234         | Krba1          | -4.888695317 | -94.973625   | 19.4271925        | 0.670692814 | 0.07474628 | No                                        |
| ILMN_2958159         | Eno1           | -4.874707071 | -522.02175   | 107.8878714       | 0.761498874 | 0.07474628 | No                                        |
| ILMN_2712733         | Pfklb1         | -4.855395807 | -31.121528   | 6.41010402        | 0.753426515 | 0.07474628 | No                                        |
| ILMN_1216732         | Mkl1           | -4.854770081 | -129.07245   | 26.58946615       | 0.764941921 | 0.14190441 | No                                        |
| ILMN_1235982         | Rai12          | -4.81287285  | -195.181925  | 40.5541418        | 0.738804591 | 0.14190441 | No                                        |
| ILMN_289247          | Tmem85         | -4.772755929 | -480.29525   | 100.6396863       | 0.697876639 | 0.14190441 | No                                        |
| ILMN_3052685         | Tro            | -4.720099446 | -133.132975  | 28.20554451       | 0.643621907 | 0.14190441 | No                                        |
| ILMN_1246446         | Lrrc59         | -4.693738614 | -35.001425   | 7.457046052       | 0.766170294 | 0.14190441 | No                                        |
| ILMN_1232692         | LOC383712      | -4.679599178 | -720.3005    | 154.1211543       | 0.728664377 | 0.14190441 | Not found                                 |
| ILMN_3028324         | Tugt1          | -4.654063073 | -44.47575    | 9.556327299       | 0.736455339 | 0.14190441 | No                                        |
| ILMN_2531388         | LOC270037      | -4.600512794 | -282.375175  | 61.37906525       | 0.766155508 | 0.14190441 | Not found                                 |
| ILMN_1239742         | Atp2a2         | -4.58911718  | -614.0235    | 133.7983256       | 0.746573246 | 0.14190441 | No                                        |
| ILMN_1234256         | LOC668038      | -4.581855022 | -69.16475    | 15.09535978       | 0.607381415 | 0.14190441 | Not found                                 |
| ILMN_2529458         | LOC230253      | -4.574068801 | -387.989875  | 84.82379886       | 0.633017844 | 0.14190441 | Not found                                 |
| ILMN_2636666         | Prodh          | -4.573625906 | -64.474525   | 14.09702637       | 0.74360861  | 0.14190441 | No                                        |
| ILMN_2945555         | Mpp2a          | -4.547654477 | -120.17975   | 26.42587527       | 0.756152953 | 0.14190441 | No                                        |
| ILMN_2679296         | Rpl18a         | -4.538897657 | -385.112575  | 84.84734677       | 0.6932979   | 0.14190441 | No                                        |
| ILMN_2685275         | Tmem109        | -4.52986400  | -192.718975  | 42.540965         | 0.741361579 | 0.14190441 | No                                        |
| ILMN_2961626         | Them2          | -4.502373129 | -304.5518    | 67.64250569       | 0.753046168 | 0.14190441 | No                                        |
| ILMN_1254705         | Atp5d          | -4.488316398 | -289.8215    | 64.5724308        | 0.763689674 | 0.14190441 | No                                        |
| ILMN_1228717         | LOC225134      | -4.471862718 | -317.0271    | 70.89374607       | 0.704810537 | 0.14190441 | Not found                                 |
| ILMN_2654896         | LOC100047998   | -4.456102818 | -940.95175   | 211.1602421       | 0.709409784 | 0.14190441 | Not found                                 |
| ILMN_2649671         | Igap           | -4.444285179 | -45.4406875  | 10.22452108       | 0.609141953 | 0.14190441 | No                                        |
| ILMN_2778279         | Fosb           | -4.408031465 | -39.9288625  | 9.058207234       | 0.731568101 | 0.14190441 | No                                        |
| ILMN_2856986         | Scg3           | -4.376487727 | -297.1398    | 67.89488089       | 0.739407857 | 0.14190441 | No                                        |
| ILMN_2599667         | LOC10039532    | -4.364042425 | -725.55525   | 166.2576069       | 0.721592405 | 0.50341627 | Not found                                 |
| ILMN_1227653         | Rpl27a         | -4.351754551 | -520.93175   | 119.7061424       | 0.756792438 | 0.50341627 | No                                        |
| ILMN_2776419         | Dncl1          | -4.316124241 | -158.008525  | 36.60889172       | 0.748753305 | 0.50341627 | No                                        |
| ILMN_2873112         | Mhm2           | -4.286646495 | -158.318275  | 36.93300224       | 0.65157353  | 0.50341627 | No                                        |
| ILMN_2655239         | LOC10041864    |              |              |                   |             |            |                                           |



## **Supplemental Experimental Procedures**

### *Mice*

Amygdala cell culture experiments were performed with male wild-type (WT) C57BL/6J p21 mice. All other experiments were performed on adult WT strain C57BL/6J or B6.129-*Tac2*<sup>tm1.1(cre)</sup>Qima/J (*Tac2*-Cre) (Mar et al., 2012) from Jackson Labs (Stock # 018938), male mice that were group-housed in a temperature-controlled vivarium, with *ad libitum* access to food and water. Animals were maintained on a 12-hour/12-hour light/dark cycle, with all behavioral procedures being performed during the light cycle. All procedures used were approved by the Institutional Animal Care and Use Committee of Emory University and in compliance with National Institutes of Health (NIH) Guide for the Care and Use of Laboratory Animals.

### *Immobilization to wooden board (IMO)*

Immobilization procedures were conducted in a room separate from behavioral testing apparatus. Each animal was immobilized by gently restraining its four limbs in a prone position to metal arms attached to a wooden board for 2 hours. All animals of the same cage received the same treatment—either immobilization or handling. After treatment, animals were returned to their home cage and remained undisturbed until fear training (Andero et al., 2011 and Andero et al., 2013).

### *mRNA extraction and microarray*

Mice were sacrificed and brains were immediately fresh frozen on dry ice and stored at -80°C. Amygdala tissue from both hemispheres was extracted by 1mm micropunch and each structure from each mouse was individually stored. Total RNA was isolated and purified from the tissue with the RNeasy Mini Kit catalog # 74106 (Qiagen) following the manufacturer's instructions. We obtained ~2 ug RNA per side

for a total of ~4 ug per brain. Amygdala tissue was used with 4 animals per condition. Electrophoresis assay and electropherogram to ensure the RNA quality was performed with Agilent 2100 BioAnalyzer PicoChip (Agilent Technologies) before the microarray. Illumina Mouse WG-6 v2 Expression BeadChip microarray (Illumina, Inc.) was assayed for 45,281 transcripts. RNA quality control, hybridizations and preliminary data analysis were conducted at the Cancer Genomics shared resource, Winship Cancer Institute (Emory University). The heat map was created with Genesis 1.4.0 (Sturn et al., 2002). FDR was calculated with SAM 4.01 using a standard 5% cutoff criteria. The cutoff criteria was set with an FDR at the 1.3 fold level for the 2hrs after fear conditioning (FC) group, since with the more conservative 1.5 fold cutoff used in the 30 min after FC group, no genes were initially identified. The criteria followed in Supplemental Table 1 and 2 for a Yes in the column “Specifically highly expressed in the amygdala”: 1) Very high expression in the amygdala (red color) 2) No expression of the gene in the hippocampus nor PFC (other key areas related to emotional learning). The search was performed on March 2014 in the Allen Brain Atlas. The pathway analysis was generated through the use of IPA (Ingenuity® Systems, [www.ingenuity.com](http://www.ingenuity.com))

#### *Complementary DNA synthesis and qPCR*

RNA isolation for q-PCR was performed as described above in a different cohort of animals than the microarray. Total RNA was reverse transcribed using the RT2 First Strand Kit catalog # 330401 (Qiagen) according to the manufacturer’s instructions. The primers used for the qPCR were TaqMan Tac2 Mm01160362\_m1, ADCYAP1R1 Mm01326453\_m1 and NK3R Mm00445346\_m1 from Applied Biosystems. q-PCR thermal cycling parameters were 10 minutes at 95°C, followed by 40 cycles of amplifications for 15 seconds at 95°C, 1 minute at 60°C. A dissociation stage, consisting of 15 seconds at 95°C, 1 minute at 60°C, and 15 seconds at 95°C, was added at the end. Quantification of mRNA was performed using the Applied Biosystems 7500 Real-Time PCR System. Relative levels of mRNA expression were normalized in all the samples with expression levels of glyceraldehyde- 3-phosphate dehydrogenase (GAPDH). Graphics are represented by fold change obtained with the  $2^{-\Delta\Delta Ct}$  method (Andero et al., 2013).

### *Elevated plus maze*

The elevated plus maze consisted of two open arms (50 × 6.5 cm) and two closed arms with a wall (50 × 6.5 × 15 cm) attached to a common central platform (6.5 × 6.5 cm) to form a cross. The maze was elevated 65 cm above the floor. Test sessions lasted 5 minutes and behaviors were continuously recorded using a video camera placed over the apparatus. Activity was analyzed with stopwatch by a researcher blind to the each mouse treatment. Arm entry was considered complete if all four paws entered a closed or open arm from the central platform (Andero et al., 2013)

### *Open Field*

The open field was an open box (27,9cm x 27,9cm) made of Plexiglas. The mice were placed in the apparatus to explore for 30 min, and then returned to home cages. Locomotor and center/periphery activity data was obtained by a video camera placed over the apparatus and analyzed using the SMART 2.5.19 video-tracking system (Panlab, Harvard Apparatus) (Andero et al., 2013).

### *Cued-Fear Conditioning and Fear Expression test*

Mice were given fear conditioning and fear expression in standard rodent modular test chambers (ENV-008-VP; Med Associates Inc) with an inside area of 30,5cm (L) x 24,1cm (W) x 21,0cm (H). Mice were given a 10-minutes chamber exposure session to habituate mice to handling and the training context. Mice that had immobilization stress were habituated to the test chambers before the stress session. The two habituation days were carried out the same days for all mice, independently if they were going to be submitted to the stress procedure or not. The tone conditioned stimulus was generated by a Tektronix function generator audio oscillator delivered through a high-frequency speaker (Motorola, Model 948) attached to side of each chamber. Mice received 5 or 10 trials of a conditioned stimulus (CS) tone (30 seconds, 6 kHz, 70 db) co-terminating with a US footshock, 500ms, 1mA. Retraining of mice (Figure 6E) was performed with a 12 kHz tone. The expression of fear was assessed 24 hours after fear conditioning and

consisted of 15 CS tone trials (30 s each) with a 1.5 minutes inter-trial interval (ITI). Tone presentation and freezing data were controlled, stored, and analyzed with FreezeView software (Coulbourn Instruments) (Andero et al., 2011, Andero et al., 2013).

### *Shock reactivity*

Shock reactivity was assessed in startle-footshock chambers (SRLAB, San Diego Instruments) consisting of a nonrestrictive acrylic plastic cylinder, 5,5 cm in diameter and 13 cm long, mounted on a Plexiglas platform which was located in a ventilated, sound-attenuated chamber. The footshock, US, was delivered through a removable stainless steel grid floor using one of four constant current shock generators (SDI, San Diego, CA) located outside the isolation chambers. A piezoelectric accelerometer mounted under each platform detected cylinder movements that were digitized and stored by an interfacing computer assembly. Shock reactivity was defined as the peak activity/accelerometer voltage that occurred during the 200 ms after the onset of the US. Response sensitivities were calibrated (SR-LAB Startle Calibration System) to be nearly identical in all startle cylinders. The tone CS was generated by a Tektronix function generator audio oscillator (Model CFG253, Beaverton, OR) and delivered through a high-frequency speaker (Motorola, Model 948) located 13 cm from the rear of each sound intensities were measured by an audiometer (Radio Shack, Ft. Worth, TX, #33-2055). Stimuli presentation and data acquisition were controlled, digitized and stored by an interfacing IBM PC compatible computer using SRLAB software. On each of 2 days prior to training, mice were given a 10- minutes startle chamber exposure session to habituate mice to handling and the training context. During cued fear training used to measure shock reactivity, mice received 5 trials of a conditioned stimulus tone (30 s, 6 kHz, 70 db) co-terminating with a US footshock 500ms, 1mA. The inter-trial training interval was 5-min (Andero et al., 2011).

## *Radioactive in situ hybridization*

The full-length clone used was obtained as expressed sequence tag clones from the NIH IMAGE database (ATCC, Manassas, VA): *Tac2* in pT7T3D (GI: 1533442). *In situ* hybridization was performed with antisense riboprobes after sequence verification of the clones. All clones analyzed were 90% homologous with mouse coding sequence as determined by National Center for Biotechnology Information basic local alignment search tool. *In situ* hybridization was performed as follows. Mice were killed by chloral hydrate overdose. Brains were rapidly removed and frozen in dry ice and stored at -80°C. Brains were sectioned at 16 µm thickness on a Leica Cryostat (Nussloch, Germany) at -20°C onto gelatin-coated slides. Sections were placed on 20 consecutive slides per brain, such that each slide contained similar sections of brain. Following a prehybridization procedure, the sections were hybridized as described previously (Rattiner et al., 2004b). [<sup>35</sup>S]UTP (1250 Ci/mmol, 12.5 mCi/ml; DuPont NEN, Boston, MA)-labeled riboprobes were prepared from linearized clones using T7 polymerase at high specific activity by only using radioactive UTP in the polymerase reaction, with around 20% incorporation. After preparation of full-length antisense RNA strands, the RNA was base hydrolyzed to average lengths of 50–100 bp and isolated using a Sephadex gravity flow column. Hybridizations were performed under Parafilm at 52°C overnight. Slides were then stringently washed, dried, and placed against Kodak (Rochester, NY) magnetic resonance autoradiography film for 5-30 days. Films were scanned into a desktop computer at 600 dpi, and images were analyzed with Adobe Systems (San Jose, CA) Photoshop software. Hybridization density quantification was performed with the mean luminosity histogram feature of Adobe Photoshop. This measure was shown to produce linear densities with <sup>14</sup>C radiation standards with the exposure times and levels used. Within one experiment, all slides hybridized to the same probe were exposed to the same piece of film. This ensured equivalent exposure times and conditions between animals and experimental groups. For each section, hybridization density was determined for the regions of interest (ROI), as well as an adjacent background area that lacks hybridization (e.g., hippocampus). For each section normalized density (ROI density - background density). The normalized densities from two different cryostat sections per brain were examined and averaged to give the density for each individual per ROI. For each experimental group, hybridization density is reported as the average density of all individual animals for that condition (Rattiner et al., 2004b). Mice included in the

analysis of the *Lv-Tac2* overexpression experiments had spread of infection in the CeA with no spread in BLA or LA.

### *Fluorescent in situ hybridization (FISH)*

Mice were anesthetized and decapitated. Brains were rapidly removed, frozen on dry ice, and stored at -80°C until processing. Tissue was sectioned at 16 µm on a cryostat and mounted on Superfrost Plus slides (Fisher Scientific). The full-length clones used were obtained as expressed sequence tag clones from the NIH IMAGE database (ATCC, Manassas, VA): *Tac2* in pT7T3D (GI: 1533442), *PKCd* in pCMV-SPORT6 (GI: 6515302), *Enk* in pDNR-LIB (GI: 6774387). cRNA riboprobes were prepared from linearized constructs for antisense sequences of *Tac2*, *PKCd* and *Enkephalin* (T7 RNA polymerase) as previously described (Jasnow et al., 2013). The *Tac2* riboprobe was labeled with fluorescein and the *PKCd* and *Enk* with digoxigenin. Following a prehybridization procedure, the sections were hybridized with both riboprobes at 65°C for 16 h and then subjected to a series of stringent washes. Sections were then incubated with anti-fluorescein-polymerized horse-radish peroxidase (POD) and Fab fragments, followed by fluorescent amplification and peroxidase quenching, and then with anti-digoxigenin-POD, Fab fragments (Roche). Signals were amplified with the TSA Plus Fluorescein Fluorescence System or TSA Plus Cy5 Fluorescence System (PerkinElmer) following each series of primary antibodies. Sections were then stained with DAPI (1:1000), washed, and coverslipped with Mowiol mounting medium. Immunofluorescence images were visualized and captured using Nikon eclipse TE300 microscope with a high resolution digital camera (Nikon, Melville, NY, USA). Confocal laser scanning microscopy was used to obtain high-resolution photomicrographs using an Orca R2 cooled CCD camera (Hamamatsu, Bridgewater, NJ, USA) mounted on a Leica DM5500B microscope (Leica Microsystems, Bannockburn, IL, USA).

### *Amygdala cell culture*

Amygdala primary cell culture from mice was performed as previously described (Mou et al., 2011).



All procedures involving animals were conducted in accordance with the NIH Guide for the Care and Use of Laboratory Animals. C57BL/6J mice (21 days postnatal) were decapitated, and amygdala was removed and immersed in ice-cold dissection buffer consisting of Hibernate-A medium (BrainBits, Springfield, IL, USA), B27 supplement (Invitrogen, Carlsbad, CA, USA), 2 mM Glutamax (Invitrogen), and gentamycin (Invitrogen) (12 µg/ mL) for the preparation amygdala neuronal cell cultures. The amygdala tissue was sliced and then enzymatically digested with papain (Worthington, Lakewood, NJ, USA) in Hibernate-A medium at 32°C for 30 minutes. Cells were dissociated by triturating with pasteur pipettes fired on tips to narrow openings. Neurons were purified in a density gradient media including Hibernate-A and OptiPrep (Sigma, St. Louis, MO, USA) by centrifugation. The density gradient media consisted of four layers. The first was 1 ml dissection buffer containing 35% OptiPrep; the second 1 ml dissection buffer contained 25% OptiPrep; the third 1 ml dissection buffer contained 20% OptiPrep; and the fourth 1 ml dissection buffer contained 15% OptiPrep. They were added on the top of each other carefully, resulting in clear layer separation. Then, cells were added on the top of density gradient media. After centrifugation, the most dense layer with a cream color, located at the middle of tube, could be seen. This layer of neurons was taken out by using a sterile transfer pipette and put into a new tube. After washing with dissection buffer, neuronal cells were plated onto Poly-D-Lysine (Sigma) coated plates or glass coverslips at the density of  $2.5 \times 10^5$  cells / cm<sup>2</sup> in culture media consisting of Neurobasal A medium (Invitrogen) with 2% B27 supplement, 2 mM glutamax and gentamycin (5 µg/mL). Thereafter, the cultures were kept in a humidified incubator at 37°C and 5% CO<sub>2</sub>, and media were changed every 5 days until used for experiments. After 2–3 weeks in vitro, the cells were used for the experiments reported in the present study.

### *Viability of neuronal cultures*

Neurons were kept in the incubator for 2 weeks post-dissection, at which point 4% Trypan blue solution (Mediatech Inc., Herndon, VA, USA) was added onto cells to test the cell viability. Trypan blue positive dead cells were counted relative to the total number of cells. There were very few (<1%) dead cells, suggesting a >99% viability of cells at the 2-week timepoint. To determine ratio of neurons to total plated

cells at the time of isolation, cells were incubated for 12 hours to let them attach the well, then fixed with methanol at  $-20^{\circ}\text{C}$  for 20 minutes. For the 2-week timepoint, cells were grown in vitro for two weeks, then fixed and stained in a similar manner. Following fixation, cells were stained with neuronal specific, mouse anti-NeuN and subsequently with goat anti-mouse Alexa Fluor 488. At the time of isolation (12 hrs post isolation) we found that  $\sim 90\%$  of the DAPI+ cells were NeuN positive. After 2 weeks in culture, we found that  $\sim 73\%$  of the DAPI+ cells were NeuN positive. Thus, we can assume that approximately  $\sim 75\%$  of the cells the study outlined within this manuscript were neuronal (Mou et al., 2011).

### *Immunocytochemistry*

Immunocytochemistry was performed as previously described (Mou et al., 2011). The antibody used was Pep2/ProNkB IHC (IS-39 ab, 1:500) (Kallo et al., 2012) and DAPI or NeuN (1:1000). This protocol began with changing half the culture media with fresh media and incubating cultures with polyclonal rabbit antisera against NkB. Cells were incubated for 30 minutes at  $37^{\circ}\text{C}$ . After washing three times with dissection buffer, culture media was returned to cells with half fresh media. To label NkB cells were incubated with goat anti-rabbit IgG conjugated with Alexa Fluor 488 (Invitrogen, 1:2000) diluted in culture media for 20 minutes in incubator. Cells were then rinsed three times with ice-cold PBS on ice and fixed with methanol at  $-20^{\circ}\text{C}$  for 20 minutes. Following washing with PBS, cells were incubated with blocking buffer (1% BSA and 3% normal goat serum in PBS) at room temperature for 1 hour. All subsequent antibodies were diluted in the blocking buffer. To detect NkB the goat anti-rabbit IgG conjugated with Alexa Fluor 568 (Invitrogen, 1:2000) was applied to cells for additional 1 hour at room temperature. Cells without primary antibody treatment and only the above secondary were used as negative controls. Immunofluorescence images were visualized and captured using Nikon eclipse TE300 microscope with a high resolution digital camera (Nikon, Melville, NY, USA). The relative immunofluorescence intensity was analyzed using software of NIS-Elements BR2.30 (Nikon).

## *Immunohistochemistry*

Pep2/ProNkB (IS-39 ab, 1:500) was the antibody used to detect NkB. The procedure was adapted from the one followed as previously described (Kallo et al., 2012). The procedure for detecting Gad65 (AB5082, Chemicon, 1:500) and CaMKII (Cell Signalling Solutions, 1:250) was followed similarly as previously described (Jasnow et al., 2013) and performed after the FISH (Jasnow et al., 2013). Brain sections (16 µm) on slides (described above) were incubated with PBS and Triton X-100, blocked with normal goat serum, bovine serum albumin, and Triton X-100, and incubated in a 1:500 dilution of primary antibody overnight at 4°C. Sections were then washed with PBS and bathed in a 1:500 dilution of secondary anti-rabbit biotinylated antibody (Ab) for 2 hr or Alexa Fluor® 568 Goat Anti-Rabbit IgG (Invitrogen 1:500). Avidin–biotin complexes were amplified using a standard Vectastain Elite ABC kit and visualized with diaminobenzidine (DAB) peroxidase staining. Sections were washed, and coverslipped with Mowiol mounting medium. Images were visualized and captured using Nikon eclipse TE300 microscope with a high resolution digital camera (Nikon, Melville, NY, USA). Confocal laser scanning microscopy was used to obtain high-resolution photomicrographs using an Orca R2 cooled CCD camera (Hamamatsu, Bridgewater, NJ, USA) mounted on a Leica DM5500B microscope (Leica Microsystems, Bannockburn, IL, USA).

## *ELISA*

Purchased from Mybiosource, Mouse Neurokinin B ELISA Kit (NKB), Catalogue #MBS744693. Inter-assay CV%: 7.5-8.6, Intra-assay CV%: 8.2-9.5, Spike Recovery: 95-103%. Procedure was followed as indicated by the manufacturer.

## *Production of Recombinant Viral Vectors*

Viral vectors are derived from the human immunodeficiency virus-based lentiviral backbones. The lenti-GFP viral plasmid was the “FUGW” vector (Huang et al., 2013). FUW-*Tac2* was created by replacing

GFP by the *Tac2* coding sequence, 0.72 kb EcoRI–XhoI fragment, in the FUGW vector (Rattiner et al., 2004). HEK 293FT (Invitrogen) cells were maintained in complete medium (4.5g/L Glucose and L-Glutamine containing DMEM supplemented with 10% FBS and 1% Pen-Strep) and incubated at 37°C, 5% CO<sub>2</sub>. One day before transfection, HEK 293FT cells were seeded onto ten 150mm plates at a density of 1x10<sup>7</sup> cells per plate in 20 ml of complete medium. The cells were approximately 70-80% confluent at the time of transfection. The day of transfection, mixture prepared as the following: 250ug of FUGW or FUW-*Tac2* + 187.5ug of pCMVdelta 8.9 + 75ug of pV-SVG + 12ml of ddH<sub>2</sub>O + 12.5ml of 0.5M Ca<sub>2</sub>Cl + 25 ml of 2x HeBS to total volume 50ml, this solution was vortexed a few seconds and incubated for 20min at room temperature, and then 5ml of the mixture added dropwise to the each dish, dishes were returned to incubator. 7 hours post-transfection, the medium was replaced with 20 ml of fresh medium and incubated for an additional 48 h before harvesting. The supernatant containing lentivirus were collected 2 days after 48h and 72h post-transfection, 2 days supernatant were combined and was centrifuged at 500xg for 5min at 40°C, followed by passage through a 0.45um low protein binding filter. The total 400ml of supernatant was loaded to six 70ml ultracentrifuge tubes in centrifuged at 28,000rpm for 2h at 40C in a 45Ti rotor (Beckman). The virus pellets were resuspended in 500ul of PBS, incubated on ice for 30min, six tubes of resuspended virus were combined, and then loaded it to a 12ml of SW 41 tube, 3ml of 20% sucrose added as a cushion, then centrifuged at 28,000rpm for 2h at 40C in a SW 41 rotor (Beckman). The virus pellet was resuspended in 100ul of PBS, incubated for 2h at 40C, then aliquot it and saved at -80°C. Procedure was followed as previously described (Huang et al., 2013). The pAAV-hSyn-double floxed hM4D-mCherry (hM4Di-mCherry AAV) was purchased from UNC Gene Therapy Center, NC, USA).

#### *Stereotaxic surgery and injection of virus*

Mice were anesthetized by i.p. injections of a Ketamine – Domitor (medetomidine) mixture and placed in a stereotaxic apparatus. CeA coordinates were as follows: anteroposterior, -1.34mm; dorsoventral, -4.4mm; mediolateral, - 2.4mm relative to bregma. For the *Lv-Tac2* experiments the animals received bilateral intra-CeA amygdala injections of lentiviral vectors expressing *Tac2*-FUW or FUGW (GFP) in 1%

BSA in phosphate buffered saline (PBS) 0.5 µl of virus/side. 1 µl of virus/side of the pAAV-hSyn-double floxed hM4D-mCherry (hM4Di-mCherry AAV) was injected in the CeA of *Tac2-Cre-* and *Tac2-Cre+* mice. For all experiments the rate of injection was 0.1 µl/min and the needle was left in place for 10 min following injection and the skin was closed using a 6-0 Vicryl suture.

### *Drugs administration*

The Nk3R antagonist osanetant (Axon Medchem) was dissolved in physiological saline and 0.1% Tween 20 which was also the vehicle. Intraperitoneally (i.p.) dose was 5 mg/kg for systemic administration. Clozapine-N-oxide (CNO, Sigma Aldrich C0832) was given i.p. at 1mg/kg (Krashes et al., 2011).

### *Stereotaxic surgery and intra-cerebral cannulation*

Mice were anesthetized by i.p. injections of a Ketamine – Domitor (medetomidine) mixture and placed in a stereotaxic apparatus. Small holes were drilled into the skull and 6 mm stainless-steel guide cannulas (Plastics One) were lowered bilaterally in to the Central Amygdala (CeA). CeA coordinates were as follows: anteroposterior, -1.34mm; dorsoventral, -4.4mm; mediolateral, - 2.4mm relative to bregma (Andero et al., 2013). Dorsoventral coordinates were measured from the skull surface with the internal cannula extending 2 mm beyond the end of the guide cannula. The guide cannula was fixed to the skull using dental acrylic and jeweler's screws and dummy cannulas (Plastics One) were inserted into each guide cannula to prevent clogging. All animals were allowed to recover for 14 days before testing. During this time, mice were handled daily for acclimation and inspection of cannula fixture. Intracerebral Infusions of 0.5 µl of drug or vehicle were made using an injection cannula (33 gauge cannula, Plastics One), which extended 2.0 mm beyond the tip of the guide cannula. Osanetant was delivered manually with a 5 µl Hamilton syringe attached to the injection cannula via polyethylene tubing (PE-10). Administration of a volume of 0,5 µl/side was delivered over a period of 60 seconds by slowly turning the microsyringe plunger. 625 ng of osanetant per side was injected. After each infusion, the injection cannula was allowed to remain

for 2 minutes. After finishing the behavioral studies mice were perfused with 4% paraformaldehyde. After fixation, brains were equilibrated in 30% sucrose, sectioned on a cryostat and stained with cresyl violet. Visualization of the cannula placement was performed on a light microscope to verify its location. Dots indicate the lowest point of the injector tip for each mouse for each group.

### *Statistics*

Statistics were performed with IBM SPSS Statistics 19.0. Detection of outliers was performed and, when necessary, removed from analyses. ANOVA followed by post-hoc analyses were appropriate, repeated-measures ANOVA or Student's t test (two-tailed) for independent samples was tested. The results are presented as means  $\pm$  or + SEM, and statistical significance was set at  $P \leq 0.05$ .
